# Supplementary material for: Do school-based violence interventions improve educational outcomes? A systematic review
Source: Research Square preprint supplement (doi:10.21203/rs.3.rs-8165658/v1), 2025-12-02
Supplement: Supplementary file 2 [file 6e59cca7da4e5de3a8b411a8.docx]

**Supplementary Materials**

**Do school-based violence interventions improve educational outcomes? A systematic review**

Contents

[Supplementary A: PRISMA Flow chart for study inclusion 2](#_Toc207283968)

[Supplementary B: Search Terms & Databases 3](#_Toc207283969)

# Supplementary A: PRISMA Flow chart for study inclusion

3 papers identified via professional networks

**Stage 1**

7,256 papers identified through Medline, Cochrane, Embase, Global Health, Psycinfo and web of science database search

**Stage 2**748 papers sampled from final review

2,102 duplicated excluded

**Stage 1**

5,154 papers screened title and abstract

5,124 excluded

**Stage 1**

30 papers screened at full text

29 systematic reviews included at stage 1

**Stage 2**511 papers screened at full text

**158 papers included at stage 2**

237 duplicated excluded

**353 excluded**

225 wrong study design (not an RCT)

1 outcomes not measured among school children

9 wrong population (not a school)

32 not a violence outcome

4 not able to access

16 not in English

48 thesis or dissertation

2 conference proceedings

16 books

**13 papers reporting on 12 trials included**

**3 excluded**

1 wrong study design (no RCT papers)

2 full text not in English

149 papers did not mention education outcomes

2 additional reviews identified through professional networks

# Supplementary B: Search Terms & Databases

Databases to search: MEDLINE, EMBASE, PsycINFO, Global Health, and Web of Science (Science and Social Science Citation Index); Cochrane Library

OVID

Medline (1699), Embase (2375)

1. Randomized Controlled Trial/ or Early Intervention, Educational/

2. (prevention or preventing or reduce or reducing or intervention or programme or program or project* or initiative or evaluation or evaluate or trial or randomi#ed control trial or effectiveness). ti,ab,kw.

3. 1 or 2

4. Child/ or Adolescent/ or Young Adult/ or Infant/ or Infant, Newborn/ or Students/ or Child, Preschool/

5. (child* or adolescen* or boy$1 or boyhood or girl* or teen* or preteen* or pubescen* or prepubescen* or youth* or juvenile* or preteen* or pre teen* or young people* or young person* or early adult* or young adult* or infan* or baby or babies or school* or pupil* or student* or nursery or preschool* or pre school* or underage or minor or partner* or spouse* or peer* or boyfriend* or boy friend* or girlfriend* or girl friend or acquaintance* or non stranger* or nonstranger* or agemate or age mate).ti,ab,kw.

6. 4 OR 5

7. Schools, Nursery/

8. (School* or classroom or learning institution or educational institution or school-based or education). ti,ab,kw.

9. 7 OR 8

10. Violence/ or Physical Abuse/ or Rape/ or Adverse Childhood Experiences/ or Child Abuse/

11. (violence or violent or aggression or maltreatment or maltreat* or abuse or corporal punish* or discipline or spanking or caning or peer violence or peer relationships or bully* or bullied or anti bully* or bully victim or cyberbull* or cybervictim* or intimate partner violence or IPV or gender based violence or GBV or dating or teen relationships or violence against children or VAC or coercion or defilement or rape$1 or rapist or incest or polyvictim* or pedophil* or peadophil* or sexual assault or restraining or exclusion or neglect* or psychosocial). ti,ab,kw.

12. sex* adj2 (violen* OR abus* OR assault* OR attack* OR aggressi* OR coerc* OR maltreat* OR victim* OR re victim* OR offence* OR offense* OR molest* OR harass* OR exploit*).ti,ab,kw

13. phys* adj2 (violen* OR abus* OR assault* OR attack* OR aggressi* OR coerc* OR maltreat* OR victim*).ti,ab,kw.

14. ((emotion* OR psychologic* OR mental) adj2 (violen* OR abus* OR maltreat*)).ti,ab,kw.

15. ((gender or peer) adj2 (violen* OR abus* OR assault* OR attack* OR aggressi* OR coerc* OR maltreat* OR victim* OR harass*)).ti,ab,kw.

16. ((intimate partner OR domestic partner OR partner* OR relationship* OR spouse* OR boyfriend* OR boy friend* OR girlfriend* OR girl friend OR date OR dating OR acquaintance* OR non stranger* OR nonstranger*) adj2 (violen* OR abus* OR assault* OR attack* OR aggressi* OR coerc* OR maltreat* OR victim*)).ti,ab,kw.

17. ((witness* OR expos*) adj2 (violen* OR abus* OR assault* OR attack* OR aggressi* OR coerc* OR maltreat* OR harass*)).ti,ab,kw.

18. 10 or 11 or 12 or 13 or 14 or 15 or 16 or 17

19. Review/ or Systematic Review/ or meta-analysis/

20. (Review* or systematic review or meta-analy* or meta analy* or synthesis) or (((comprehensive* or integrative or systematic*) adj3 (bibliographic* or review* or literature)) or (meta-analy* or metaanaly* or "research synthesis" or ((information or data) adj3 synthesis) or (data adj2 extract*))).ti,ab,kw.

21. 19 or 20

22. 3 and 6 and 9 and 18 and 21

23 limit 22 to last 5 years
